# Supplementary material
Source: ML conference proceedings conference paper supplement (https://openreview.net/forum?id=9V3crVSPH7)
Supplement: supplementary_material [file 11454_Supplementary_Materia_RAD.pdf › supplement/11454_Supplementary_Materia_RAD.pdf]

---

# Supplementary Material:

## RAD: Training an End-to-End Driving Policy via Large-Scale 3DGS-based Reinforcement Learning

---

Anonymous Author(s)

Affiliation

Address

email

### 1 Technical Appendices and Supplementary Material

2 The complete technical details are included as a technical appendix at the end of the main paper.

3 In addition, we include a supplementary video (`closed-loop.mp4`, contained in the ZIP archive),  
4 which presents side-by-side comparisons between the RAD policy and the IL-only policy in selected  
5 challenging driving scenarios.
